# Supplementary material
Source: PubMed Central journal article supplement (PMC5984708)

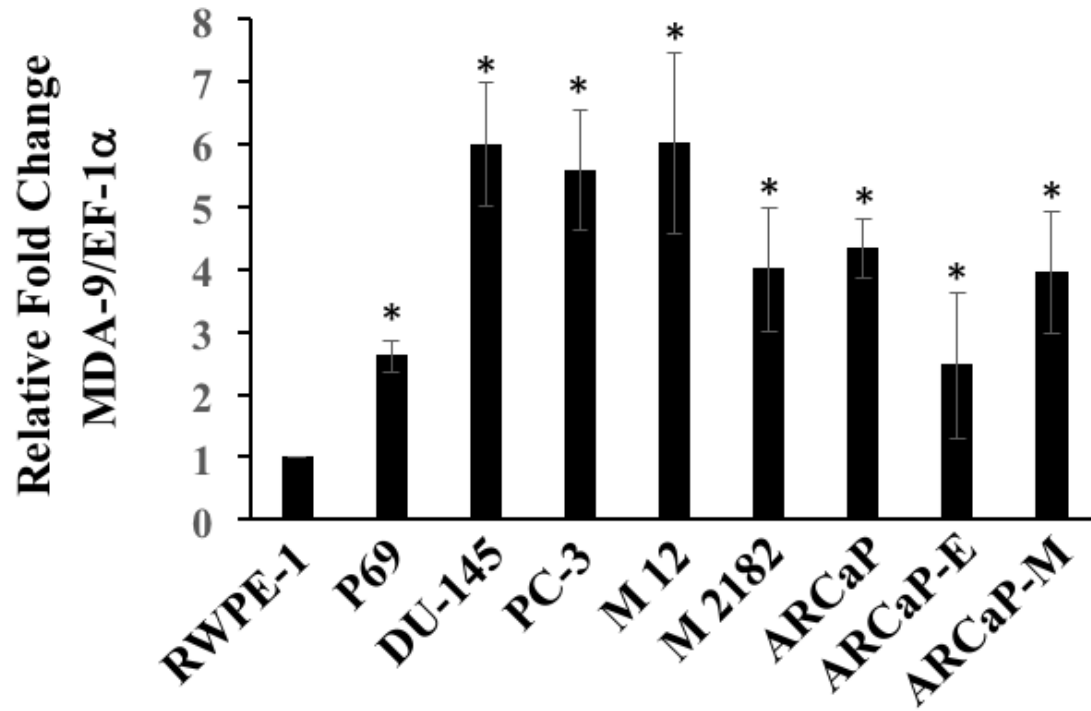

Supplement: NIHMS954988-supplement-1.pdf [file NIHMS954988-supplement-1.pdf]

**A**

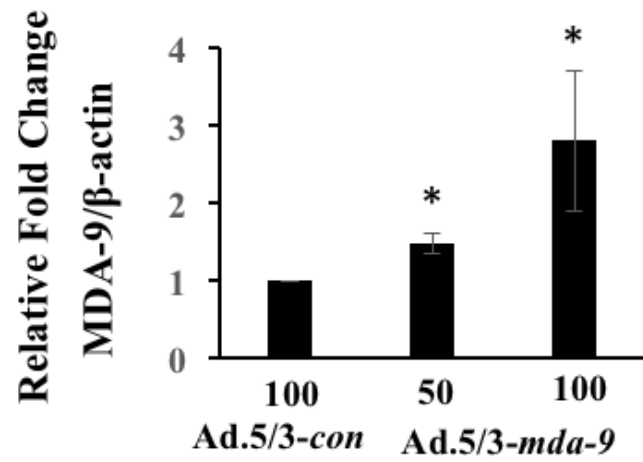

**B**

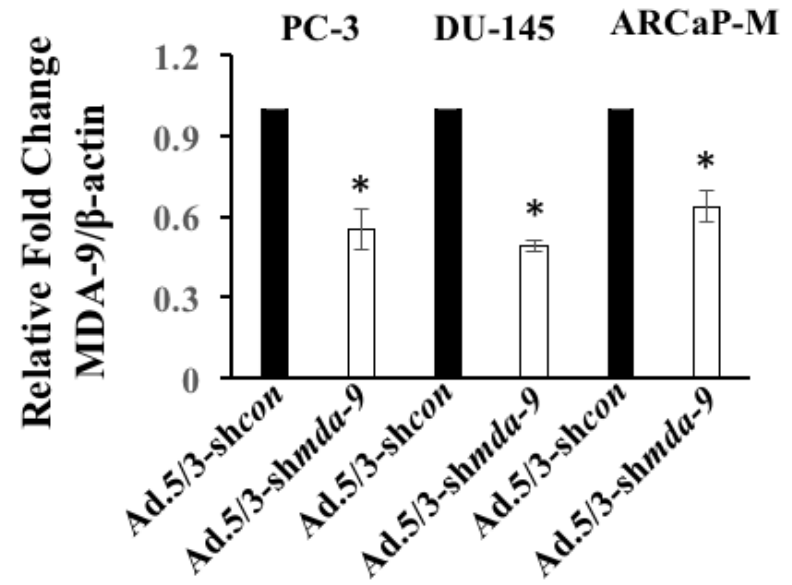

Supplement: NIHMS954988-supplement-2.pdf [file NIHMS954988-supplement-2.pdf]

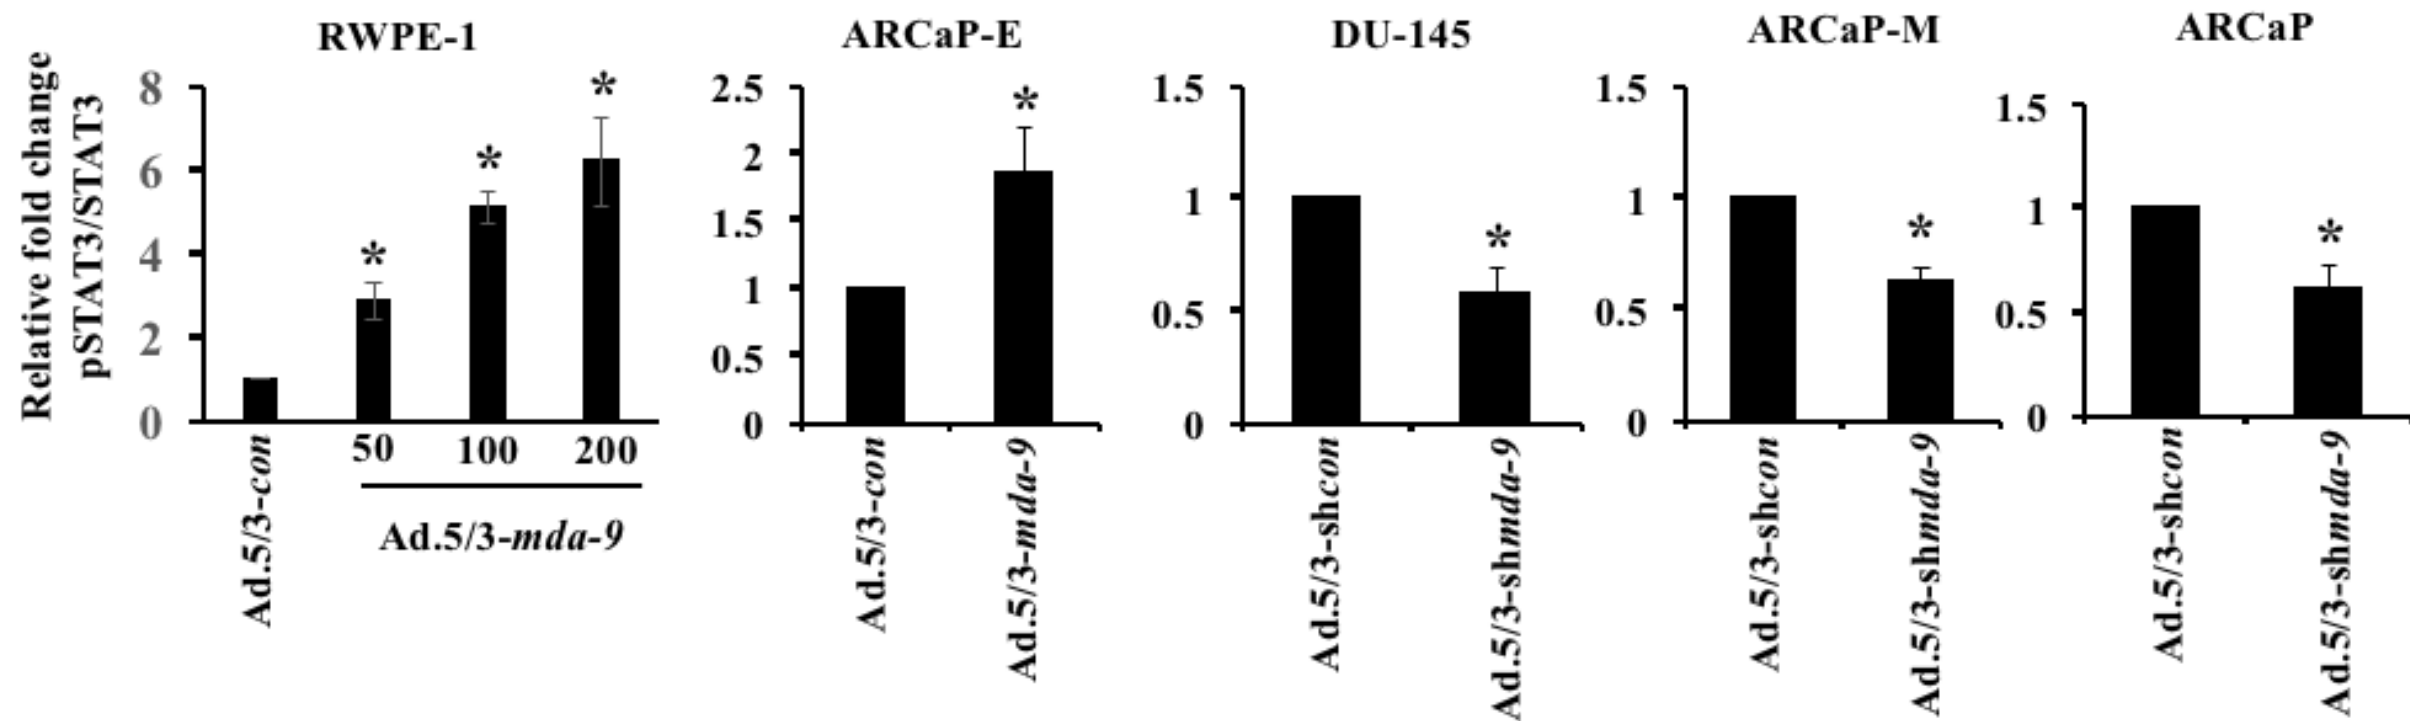

Supplement: NIHMS954988-supplement-3.pdf [file NIHMS954988-supplement-3.pdf]

**A**

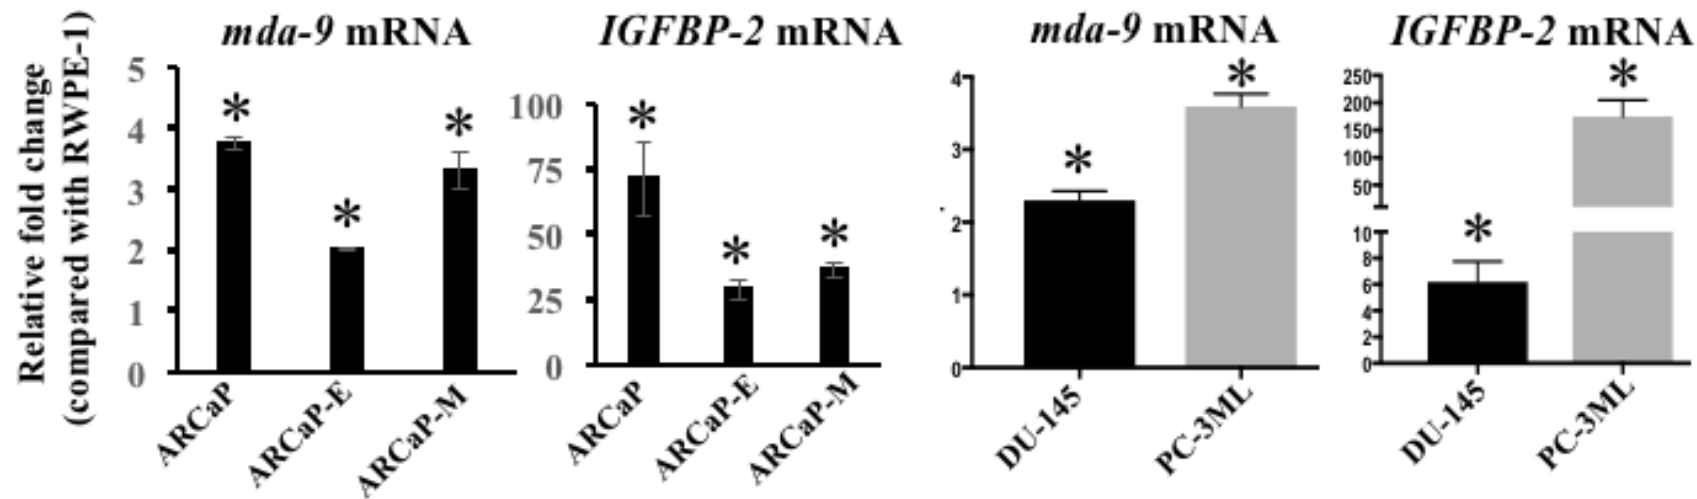

**B**

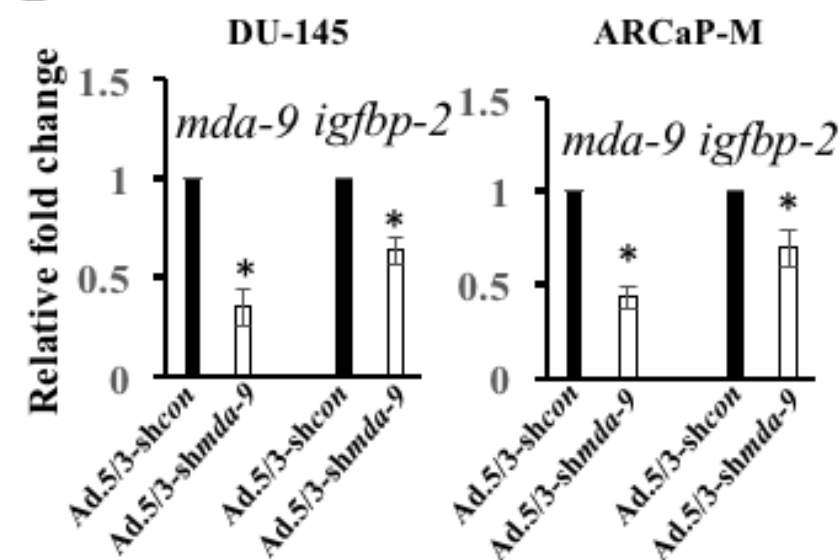

**C**

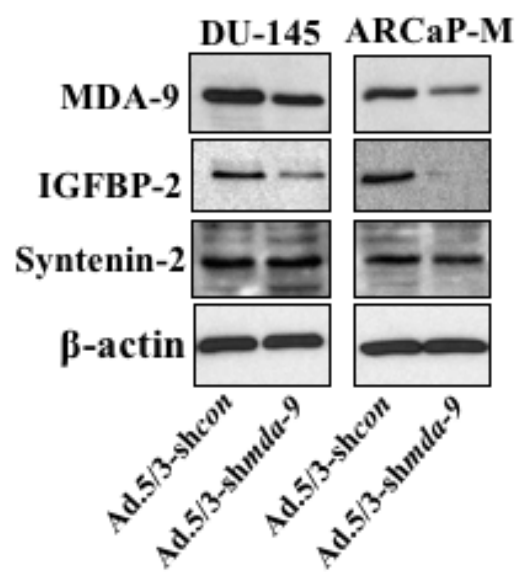

**D**

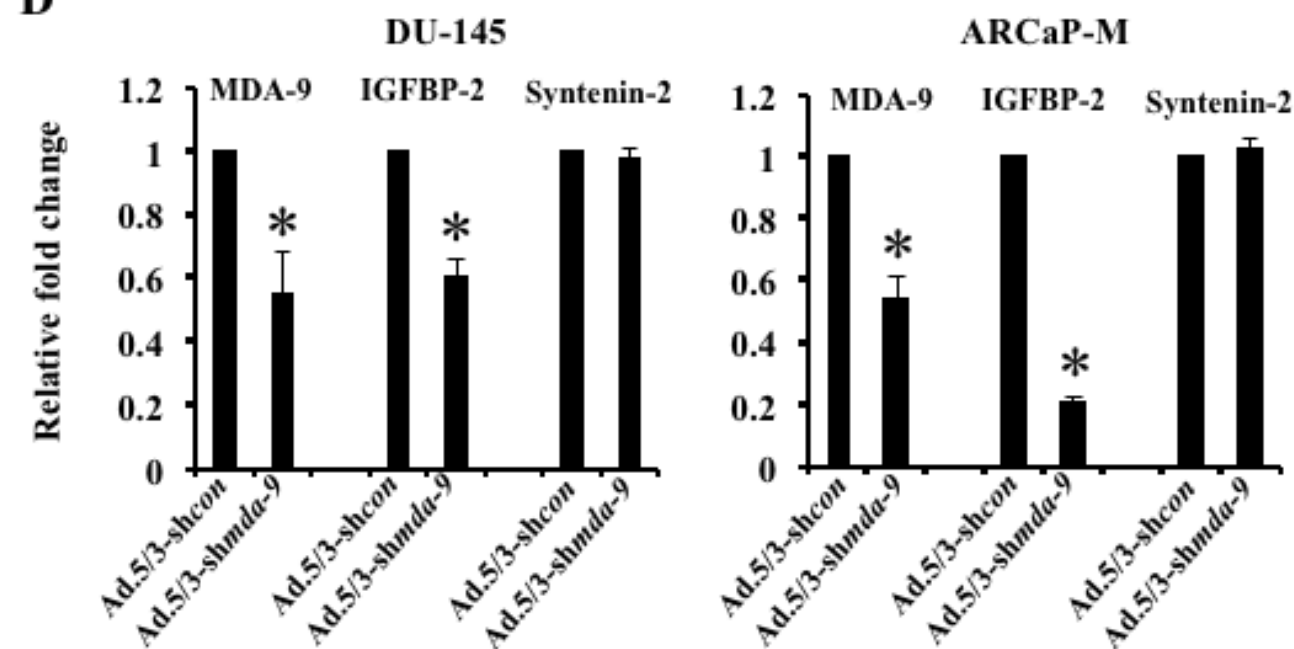

**E**

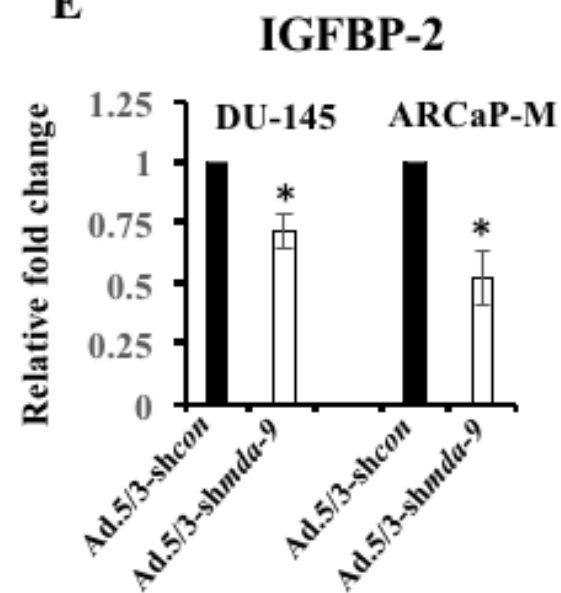

Supplement: NIHMS954988-supplement-4.pdf [file NIHMS954988-supplement-4.pdf]

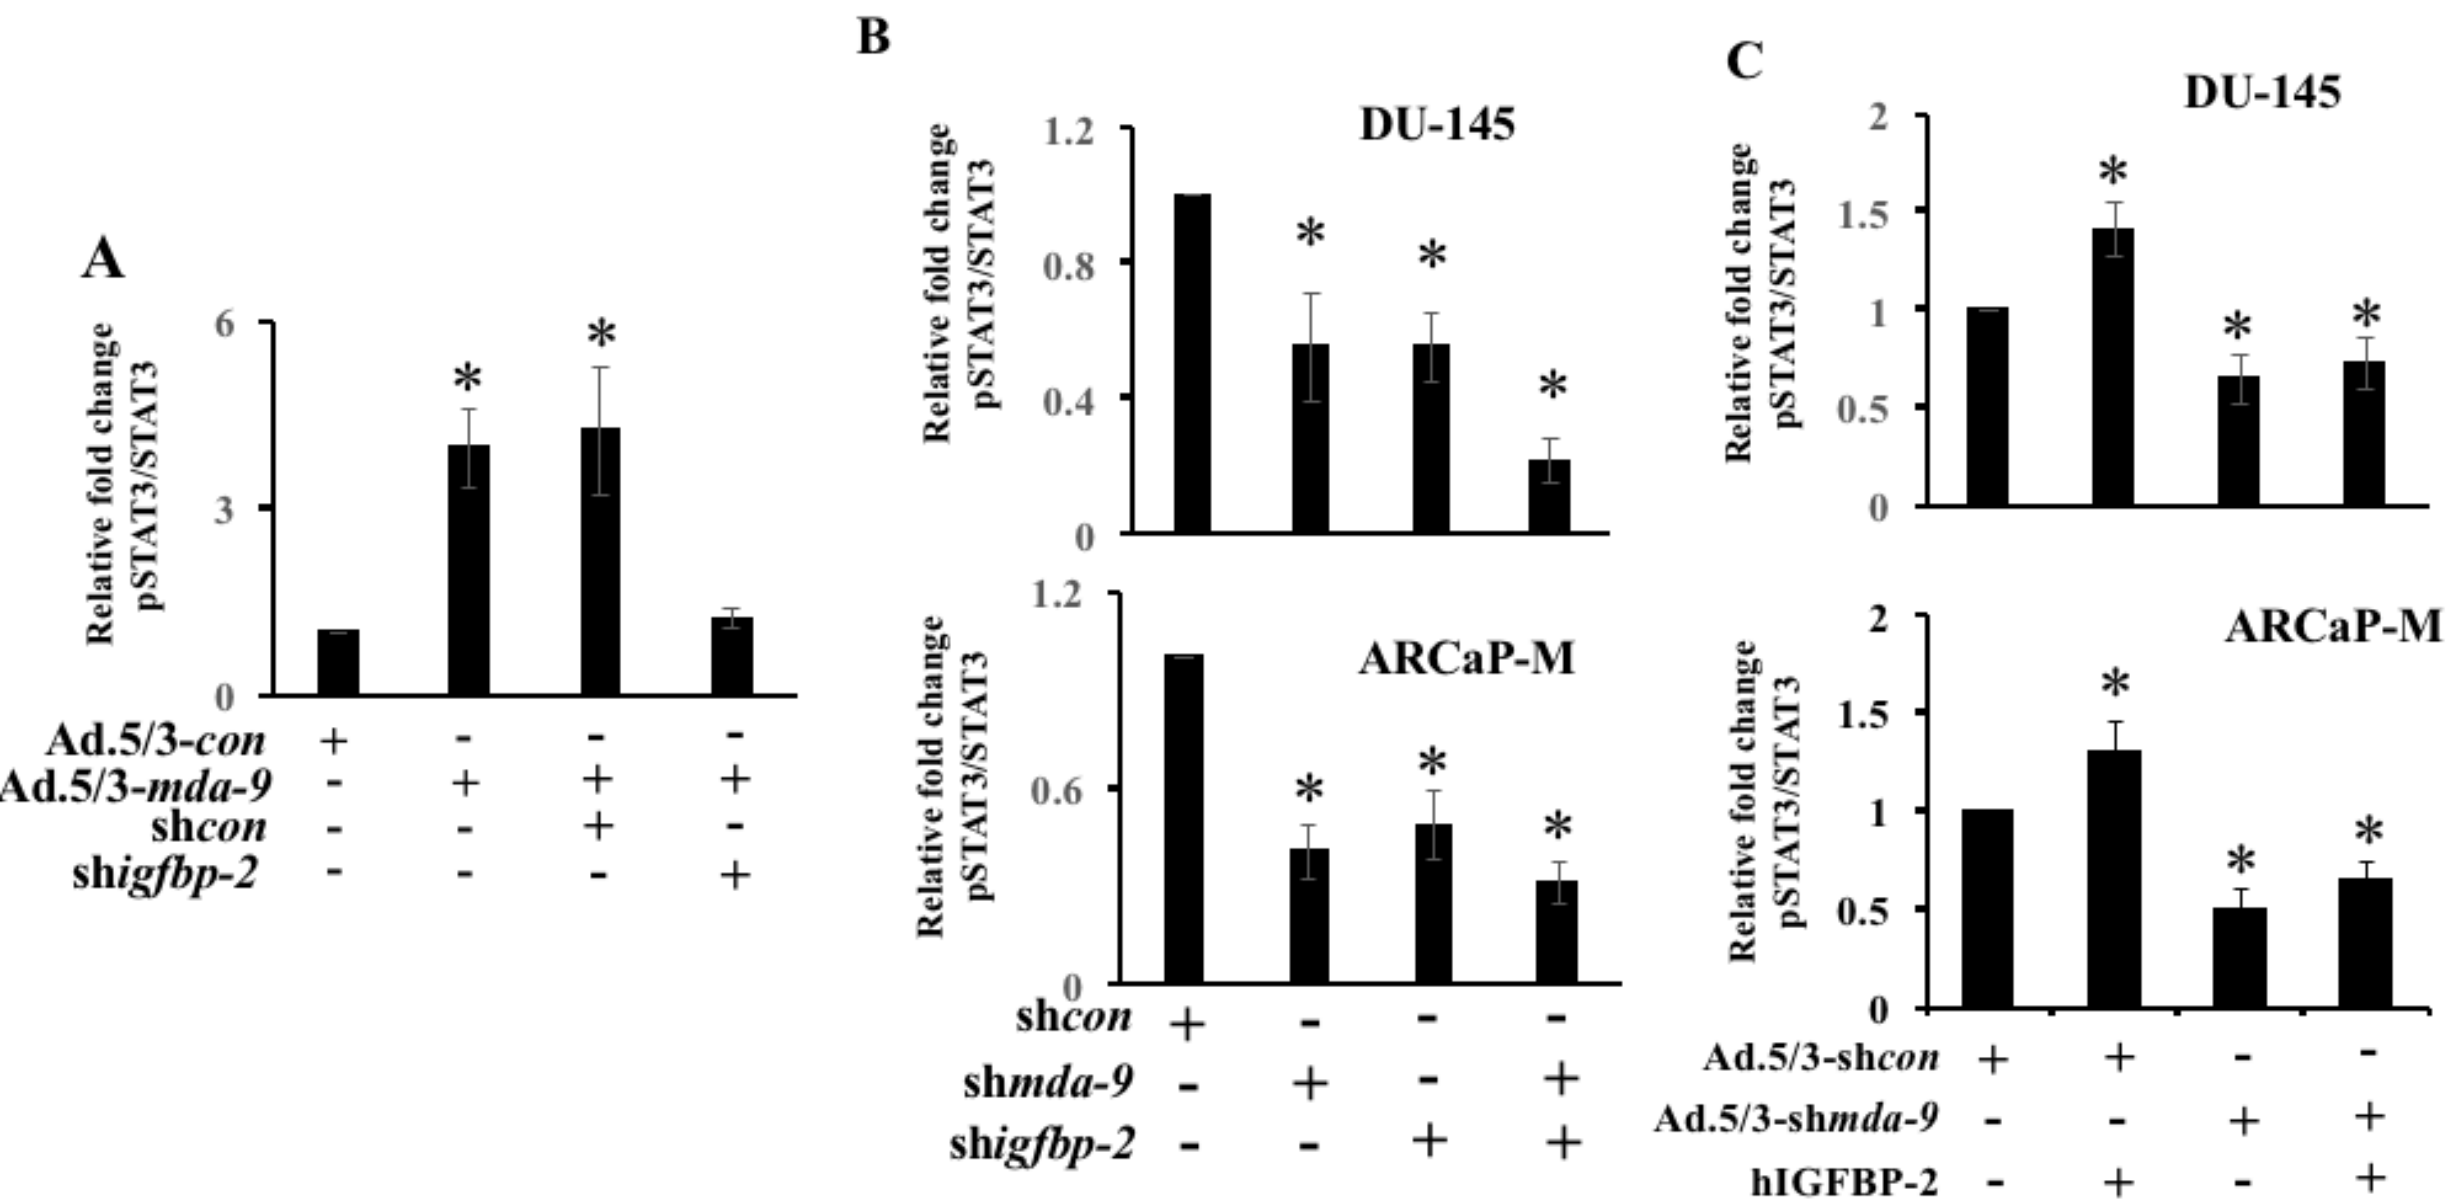

Supplement: NIHMS954988-supplement-5.pdf [file NIHMS954988-supplement-5.pdf]

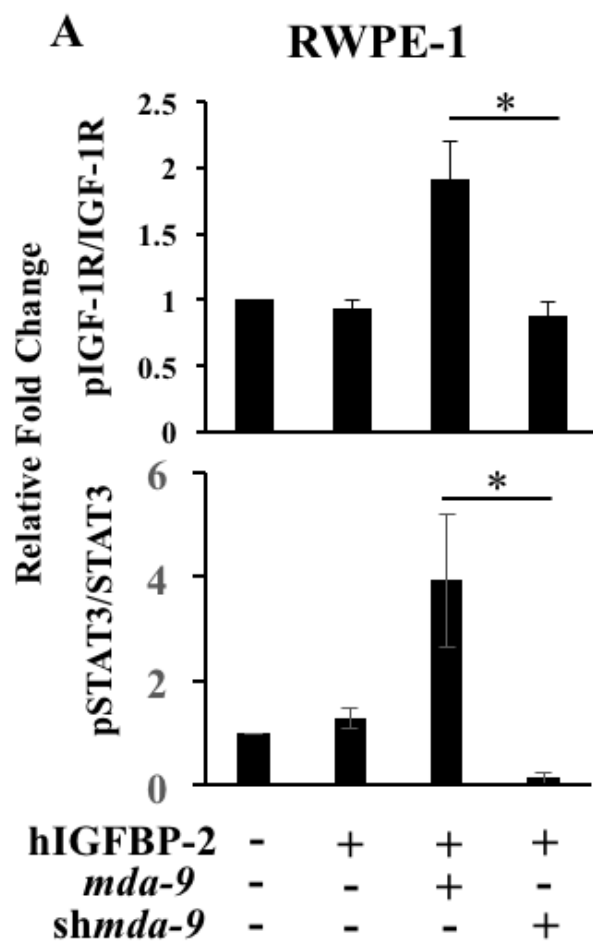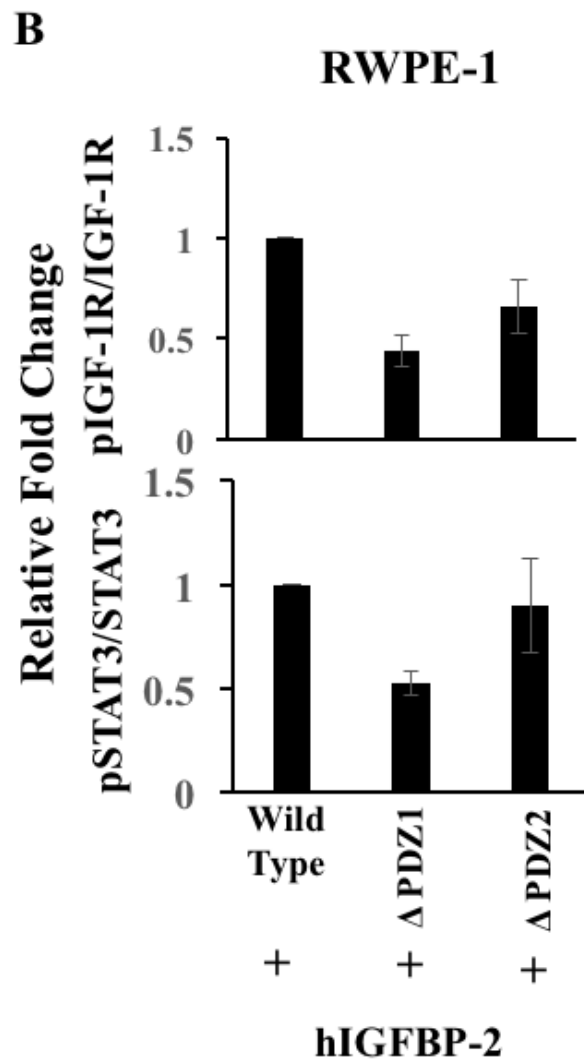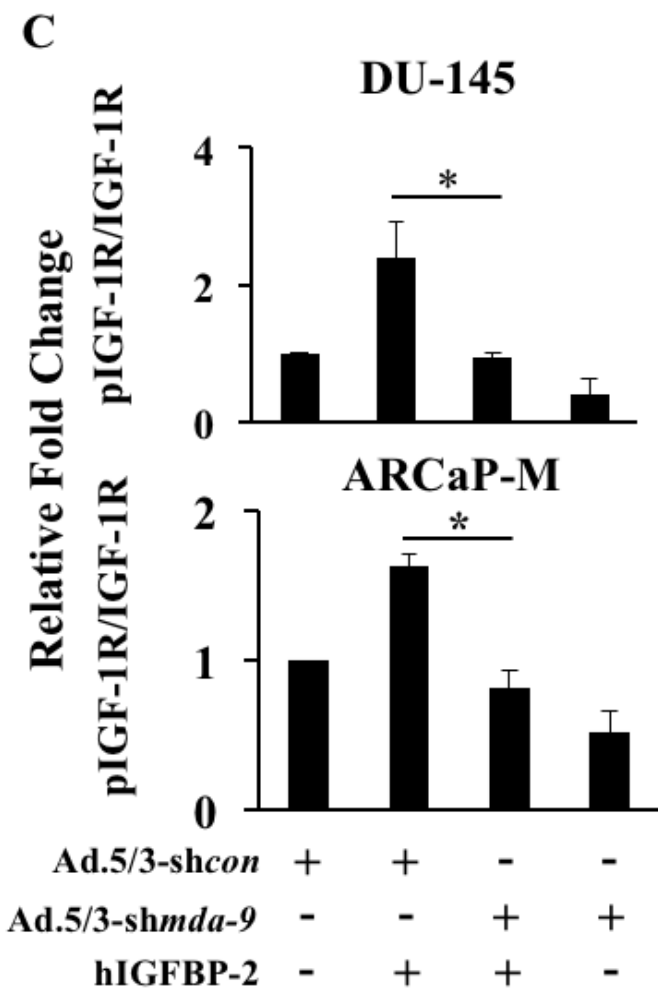

Supplement: NIHMS954988-supplement-6.pdf [file NIHMS954988-supplement-6.pdf]

**A**

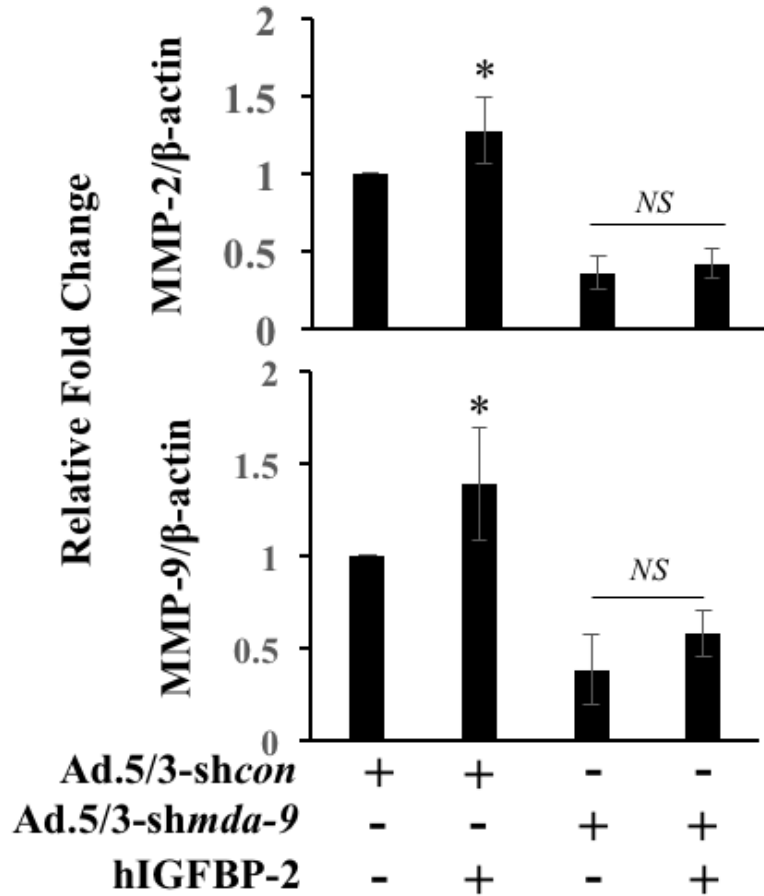

**B**

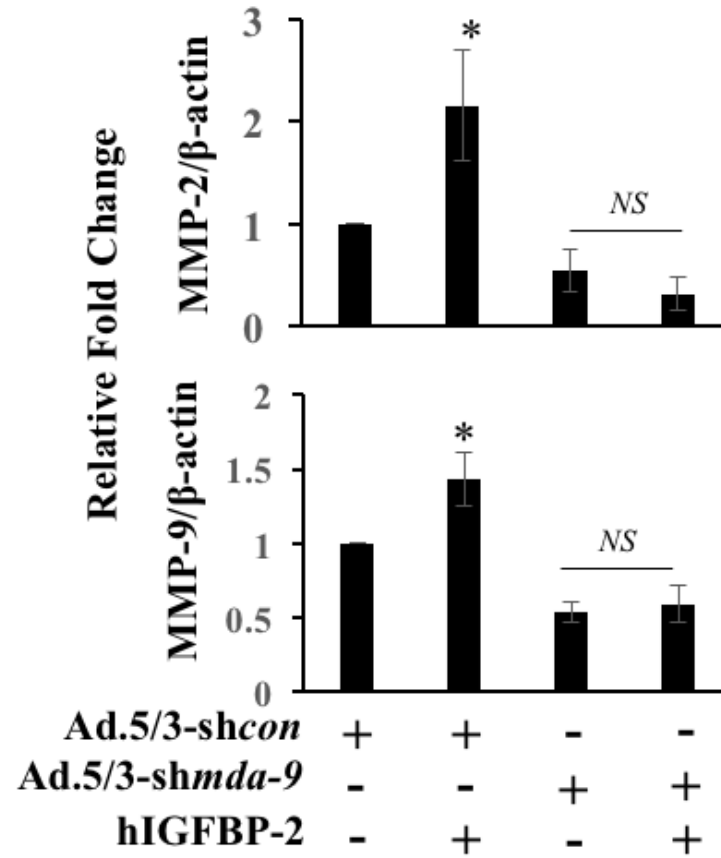

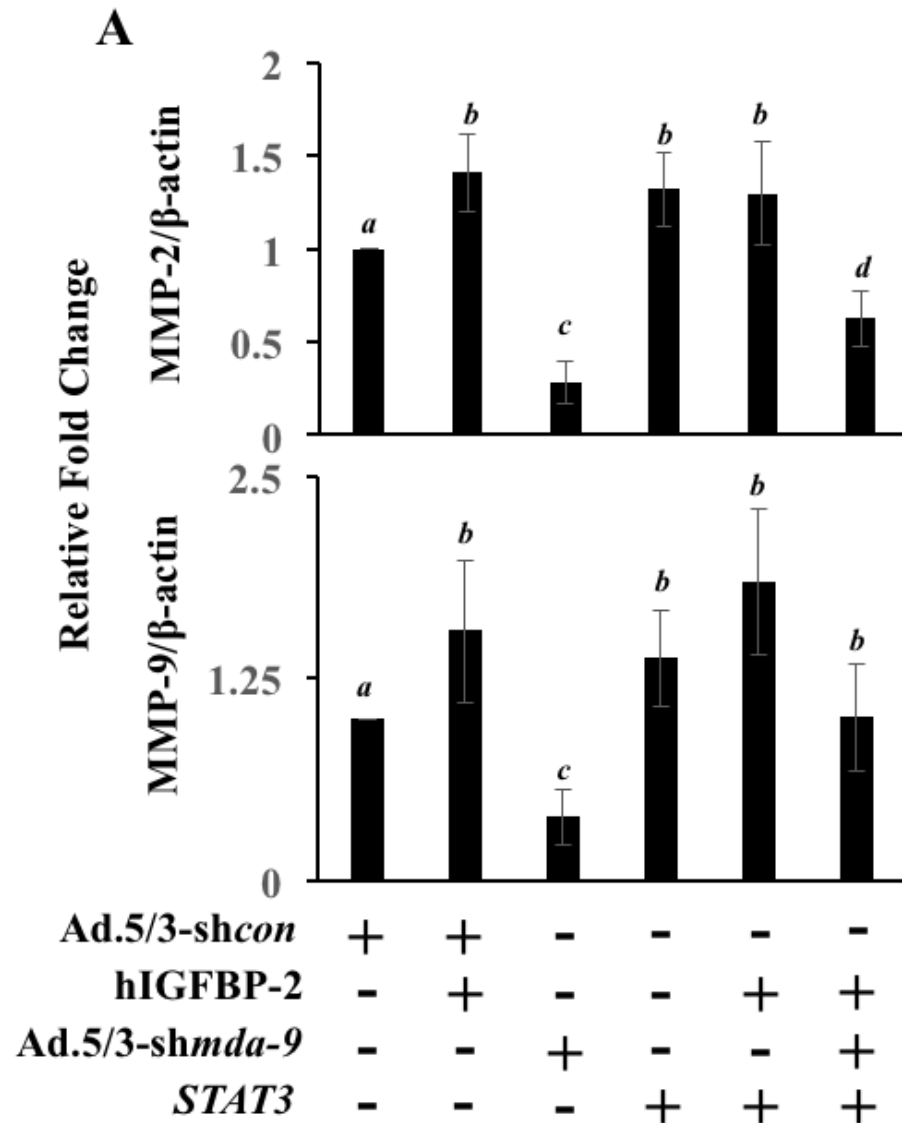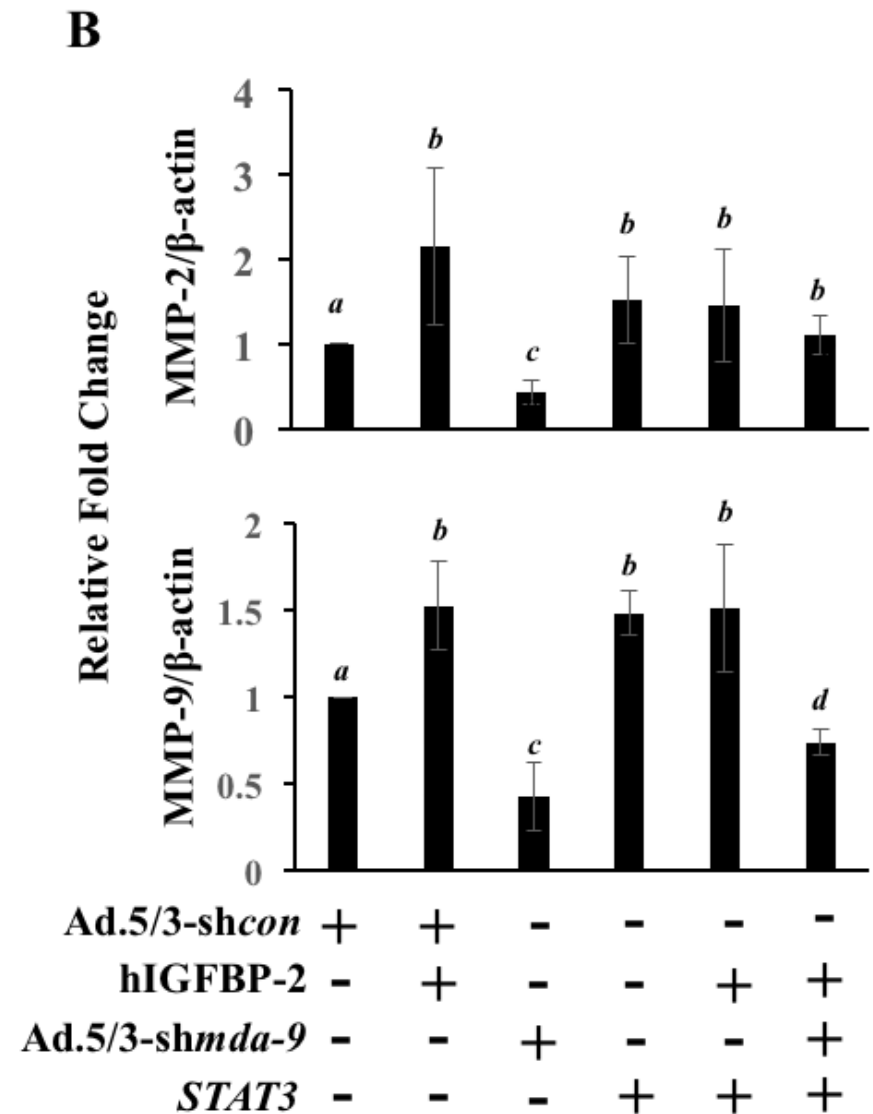

Supplement: NIHMS954988-supplement-7.pdf [file NIHMS954988-supplement-7.pdf]
